# Supplementary material
Source: Springer Nature journal article supplement (https://www.springermedizin.de/resource/supplementary/12943_2010_709_MOESM7_ESM.pdf/9554632)

**A**

Ctrl

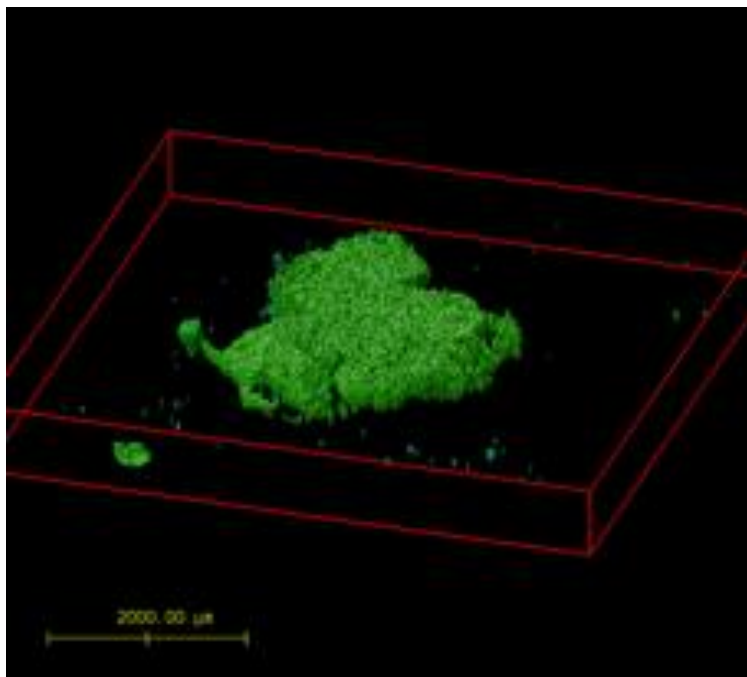

TW

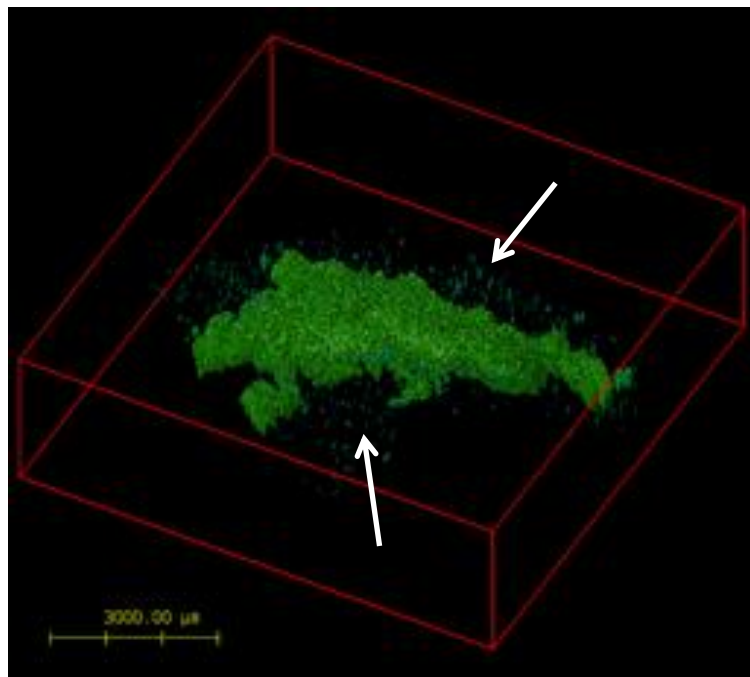**B**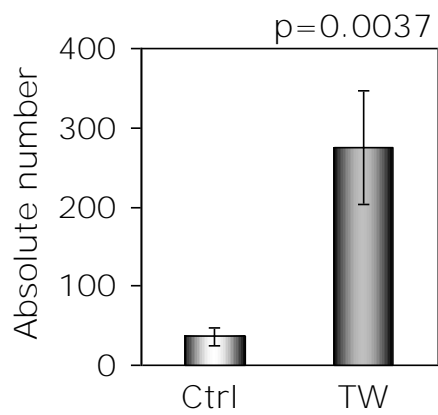**C**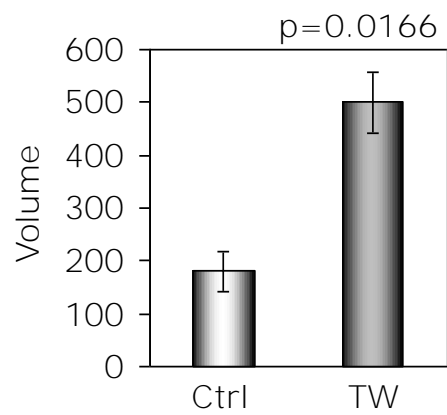

Supplement: MOESM7 [file 9554632]
